# Supplementary material for: Transcriptomic and metabolomic reveals silicon enhances adaptation of rice under dry cultivation by improving flavonoid biosynthesis, osmoregulation, and photosynthesis
Source: Front Plant Sci. 2022 Aug 4;13:967537. doi: 10.3389/fpls.2022.967537 (PMC9386530; doi:10.3389/fpls.2022.967537)
Supplement: Supplementary Table 5 — Top KEGG enrichment results in leaves and roots in detail. [file Table_5.XLSX]

## Sheet: DSL VS DL difference KEGG
				MapID	MapTitle	Pvalue	x	y	n	N	EnrichDirect	MetaIDs	kegg_cpd_id
				map00450	Selenocompound metabolism	0.0301205	1	1	10	332	Over	L-Alanine	cpd:C00041
				map00071	Fatty acid degradation	0.0879243	1	3	10	332	Over	Palmitaldehyde	cpd:C00517
				map04122	Sulfur relay system	0.115647	1	4	10	332	Over	L-Alanine	cpd:C00041
				map00430	Taurine and hypotaurine metabolism	0.142609	1	5	10	332	Over	L-Alanine	cpd:C00041
				map00460	Cyanoamino acid metabolism	0.142609	1	5	10	332	Over	Alanine	cpd:C01401
				map01502	Vancomycin resistance	0.142609	1	5	10	332	Over	L-Alanine	cpd:C00041
				map00908	Zeatin biosynthesis	0.194325	1	7	10	332	Over	Adenine	cpd:C00147
				map00340	Histidine metabolism	0.219115	1	8	10	332	Over	Ergothioneine	cpd:C05570
				map00710	Carbon fixation in photosynthetic organisms	0.266646	1	10	10	332	Over	L-Alanine	cpd:C00041
				map00250	Alanine, aspartate and glutamate metabolism	0.289421	1	11	10	332	Over	L-Alanine	cpd:C00041
				map00270	Cysteine and methionine metabolism	0.311558	1	12	10	332	Over	L-Alanine	cpd:C00041
				map00360	Phenylalanine metabolism	0.333071	1	13	10	332	Over	N-Acetyl-D-phenylalanine	cpd:C05620
				map00480	Glutathione metabolism	0.353978	1	14	10	332	Over	(5-L-Glutamyl)-L-amino acid	cpd:C03740
				map00970	Aminoacyl-tRNA biosynthesis	0.374293	1	15	10	332	Over	L-Alanine	cpd:C00041
				map00941	Flavonoid biosynthesis	0.449931	1	19	10	332	Over	Homoeriodictyol	cpd:C09756
				map01200	Carbon metabolism	0.449931	1	19	10	332	Over	L-Alanine	cpd:C00041
				map00330	Arginine and proline metabolism	0.484572	1	21	10	332	Over	Agmatine	cpd:C00179
				map00240	Pyrimidine metabolism	0.517237	1	23	10	332	Over	5-Methylcytosine	cpd:C02376
				map00230	Purine metabolism	0.590907	1	28	10	332	Over	Adenine	cpd:C00147

## Sheet: DSR VS DR diff KEGG
MapID	MapTitle	Pvalue	x	y	n	N	EnrichDirect	MetaIDs	kegg_cpd_id
map04075	Plant hormone signal transduction	0.00298385	2	4	8	332	Over	Jasmonic acid, (-)-Jasmonoyl-L-isoleucine	cpd:C08491,cpd:C18699
map00310	Lysine degradation	0.0251062	2	11	8	332	Over	L-Pipecolate, L-2-Aminoadipic acid	cpd:C00408,cpd:C00956
map00592	alpha-Linolenic acid metabolism	0.0933649	1	4	8	332	Over	Jasmonic acid	cpd:C08491
map00920	Sulfur metabolism	0.0933649	1	4	8	332	Over	2-Aminoethanesulfonic acid	cpd:C00245
map00430	Taurine and hypotaurine metabolism	0.115478	1	5	8	332	Over	2-Aminoethanesulfonic acid	cpd:C00245
map00300	Lysine biosynthesis	0.137118	1	6	8	332	Over	L-2-Aminoadipic acid	cpd:C00956
map00440	Phosphonate and phosphinate metabolism	0.137118	1	6	8	332	Over	Ribose 5-phosphate	cpd:C00117
map00230	Purine metabolism	0.139922	2	28	8	332	Over	Ribose 5-phosphate, Adenine	cpd:C00117,cpd:C00147
map01100	Metabolic pathways	0.153793	7	201	8	332	Over	Ribose 5-phosphate, Jasmonic acid, 2-Aminoethanesulfonic acid, N-Acetylputrescine, L-Pipecolate, Adenine, L-2-Aminoadipic acid	cpd:C00117,cpd:C08491,cpd:C00245,cpd:C02714,cpd:C00408,cpd:C00147,cpd:C00956
map00908	Zeatin biosynthesis	0.158293	1	7	8	332	Over	Adenine	cpd:C00147
map00710	Carbon fixation in photosynthetic organisms	0.219115	1	10	8	332	Over	Ribose 5-phosphate	cpd:C00117
map01230	Biosynthesis of amino acids	0.229863	2	38	8	332	Over	Ribose 5-phosphate, L-2-Aminoadipic acid	cpd:C00117,cpd:C00956
map00030	Pentose phosphate pathway	0.238516	1	11	8	332	Over	Ribose 5-phosphate	cpd:C00117
map00960	Tropane, piperidine and pyridine alkaloid biosynthesis	0.257494	1	12	8	332	Over	L-Pipecolate	cpd:C00408
map01110	Biosynthesis of secondary metabolites	0.264031	4	104	8	332	Over	Ribose 5-phosphate, Jasmonic acid, L-Pipecolate, L-2-Aminoadipic acid	cpd:C00117,cpd:C08491,cpd:C00408,cpd:C00956
map01210	2-Oxocarboxylic acid metabolism	0.311967	1	15	8	332	Over	L-2-Aminoadipic acid	cpd:C00956
map01200	Carbon metabolism	0.379143	1	19	8	332	Over	Ribose 5-phosphate	cpd:C00117
map00330	Arginine and proline metabolism	0.410524	1	21	8	332	Over	N-Acetylputrescine	cpd:C02714
map02010	ABC transporters	0.593968	1	35	8	332	Over	2-Aminoethanesulfonic acid	cpd:C00245
